# Supplementary material for: Ethnomedicinal Plants with Protective Effects against Beta-Amyloid Peptide (Aβ)1-42 Indicate Therapeutic Potential in a New In Vivo Model of Alzheimer’s Disease
Source: MDPI journal article supplement (doi:10.3390/antiox11101865), 2022-09-21
Supplement: s1 [file s1]

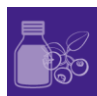

## Supplementary Materials

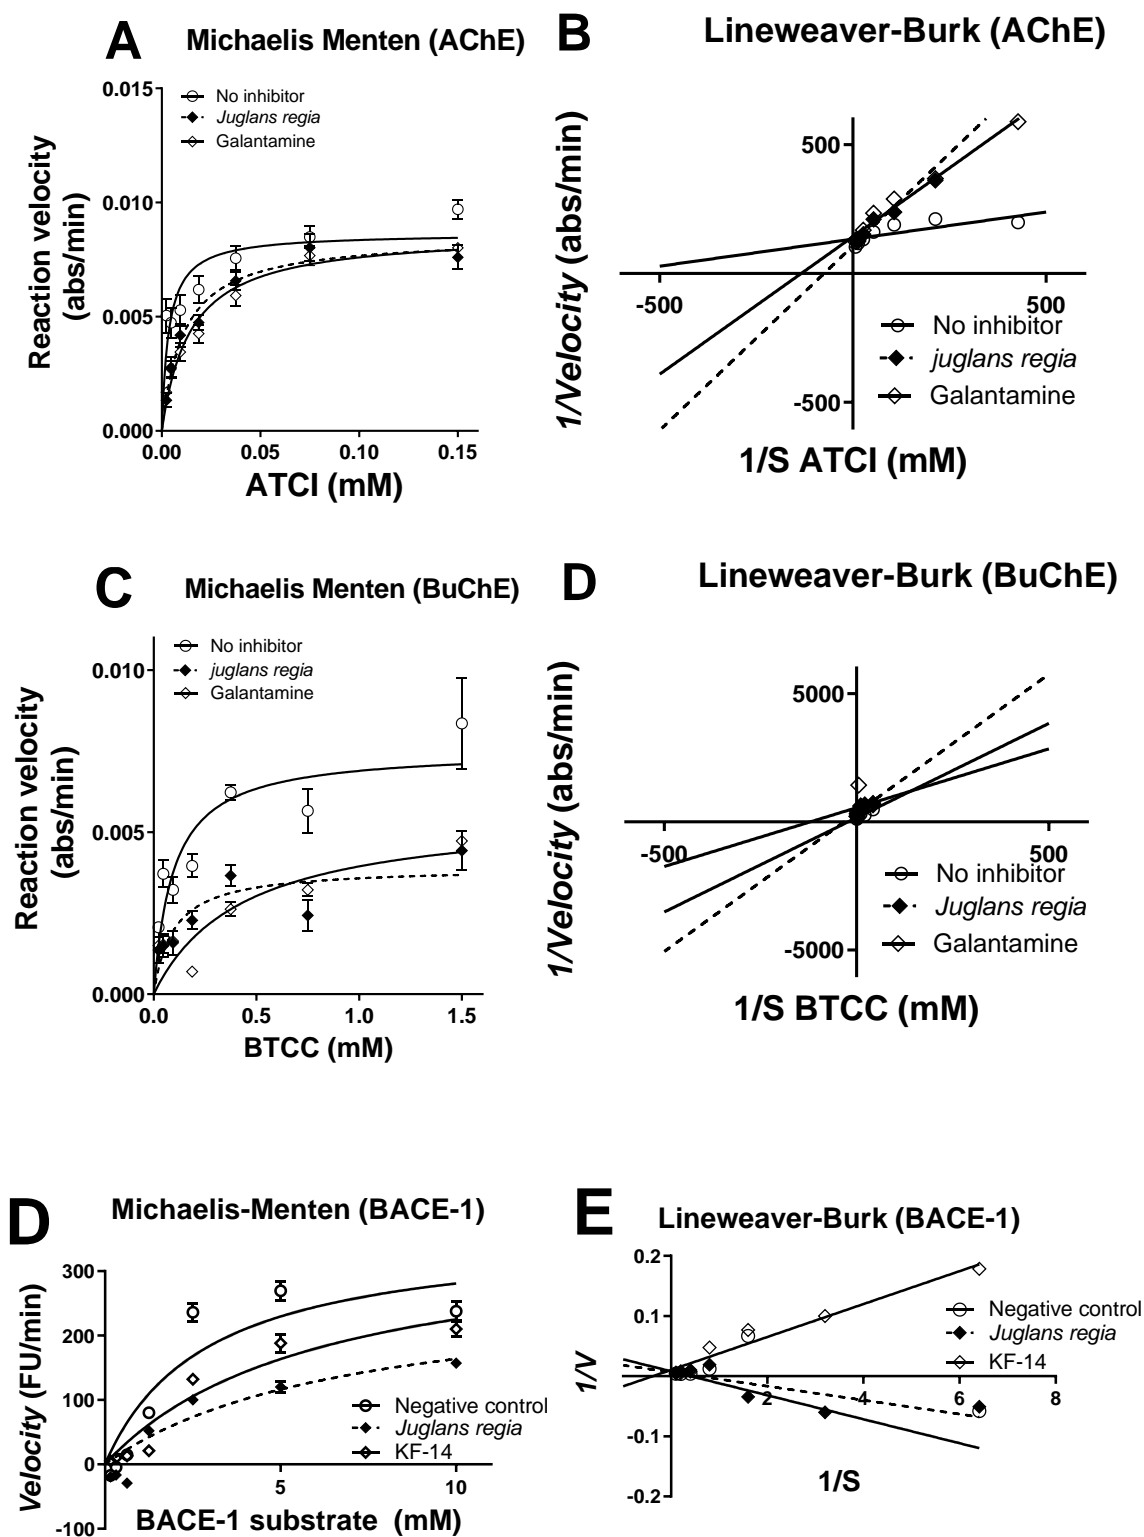

**Figure S1.** Inhibitory properties of *Juglans regia* extract compared with known inhibitors. (A) and (C) show the Michaelis–Menten curves and (B) and (D) the Lineweaver–Burk plots for acetylcholinesterase (AChE) and butyrylcholinesterase (BuChE) inhibitory properties of *J. regia*. Substrate

concentrations were varied in the presence of a fixed amount of *J. regia* extract or galantamine. It was determined that both *J. regia* and galantamine are competitive inhibitors of AchE. For BuChE, *J. regia* acted in a non-competitive manner and galantamine was a ‘mixed’ inhibitor. (E) show the Michaelis–Menten curves and the Lineweaver–Burk plots for  $\beta$ -secretase 1 (BACE-1) inhibitory properties of *J. regia*. Substrate concentrations were varied in the presence of a fixed amount of *J. regia* extract or KF-14. It was determined that *J. regia* extract had a ‘mixed’ mode of action whereas KF-14 was a competitive inhibitor for BACE-1.

**Table S1.** Extracts of ethnomedicinal plants ( $n = 18$ ) used in this study. The ethanolic extract yield for each plant’s part is specified.

| #  | Botanical Name/<br>Common Name                       | Plant Family  | Region of<br>Origin | Traditional<br>Use/Treatment/Benefits<br>in Neurology | Part(s) Used       | Extract<br>Yield<br>(%)* |
|----|------------------------------------------------------|---------------|---------------------|-------------------------------------------------------|--------------------|--------------------------|
| 1  | <i>Anemarrhena asphodeloides</i> /<br>Zhi mu         | Asparagaceae  | China               | Neurodegenerative diseases [67].                      | Rhizome            | 26.32                    |
| 2  | <i>Capsella bursa-pastoris</i> /<br>Shepherd's Purse | Brassicaceae  | Europe              | Memory [68].                                          | Herb               | 5.24                     |
| 3  | <i>Centella asiatica</i> /<br>Gotu Kola              | Umbelifers    | Asia                | Anxiety, cognition and emotional disorders [69].      | Leaf               | 9.06                     |
| 4  | <i>Cinnamomum zeylanicum</i> /<br>Cinnamon           | Lauraceae     | Sri Lanka           | Nervous stress, ‘nervine tonic’ [70].                 | Bark               | 3.11                     |
| 5  | <i>Curcuma longa</i> /<br>Turmeric                   | Zinziberaceae | Southern Asia       | Depression [71].                                      | Rhizome            | 3.62                     |
| 6  | <i>Ellettaria cardamomum</i> /<br>Cardamom           | Zingiberaceae | South India         | Anxiety [72].                                         | Seed               | 8.10                     |
| 7  | <i>Euphorbia hirta</i> / Snakeweed                   | Euphorbiaceae | India               | Anxiety [73].                                         | Leaf               | 7.20                     |
| 8  | <i>Euphoria longan</i> /<br>Longan                   | Sapindaceae   | Southern China      | Learning and memory [74].                             | Fruit              | 22.19                    |
| 9  | <i>Fritillaria thunbergii</i> /<br>Zhe Bei Mu        | Liliaceae     | China               | Epilepsy, Neuroprotection [75,76].                    | Bulb               | 1.83                     |
| 10 | <i>Hypericum perforatum</i> /<br>Saint John's wort   | Hypericaceae  | Europe, Asia        | Depression and anxiety [77].                          | Flower             | 8.12                     |
| 11 | <i>Hyssopus officinalis</i> / Hyssop                 | Lamiaceae     | Europe              | Nervous disorders [78].                               | Flower, young leaf | 2.53                     |
| 12 | <i>Juglans regia</i> / Walnut                        | Junlandaceae  | Central Asia        | Neuroprotection, memory, and learning [79].           | Leaf               | 8.02                     |
| 13 | <i>Leonurus cardiaca</i> /<br>Motherwort             | Lamiaceae     | Europe, Asia        | Sleep disorders and anxiety [80].                     | Aerial             | 5.23                     |
| 14 | <i>Lilium brownie</i> /<br>Lily bulb                 | Lamiaceae     | Europe              | Anxiety and apprehension [81].                        | Flower, young leaf | 6.64                     |
| 15 | <i>Paullinia cupana</i> /<br>Saint John's wort       | Hypericaceae  | Europe, Asia        | Cognition [82].                                       | Flower             | 6.82                     |
| 16 | <i>Salvia officinalis</i> /<br>Sage                  | Lamiaceae     | Mediterranean       | Memory [83].                                          | Flower and leaf    | 6.62                     |
| 17 | <i>Uncaria rhynchophylla</i> /<br>Cat's Claw Walnut  | Junlandaceae  | Central Asia        | Epilepsy [84].                                        | Leaf               | 3.63                     |
| 18 | <i>Zingiber officinale</i> /<br>Ginger               | Zingiberaceae | Southeast Asia      | Anxiety [85].                                         | Rhizome            | 1.23                     |

\*Percentage yield of extracts obtained after extraction of plant materials in 70% ethanol solution.

**Table S2.** % acetylcholinesterase inhibitory activity of ethanolic plant extracts ( $n = 18$ ). NC= Negative control Sodium phosphate buffer); PC= Positive control (Galantamine 18  $\mu$ M).

| Plant Extract (mg/mL)            | NC (%)    | PC (%)   | 25 (%)   | 50 (%)   | 100 (%)  | 250 (%)  | 500 (%)  |
|----------------------------------|-----------|----------|----------|----------|----------|----------|----------|
| <i>Anemarrhena asphodeloides</i> | 0.585578  | 59.333   | 22.56158 | 24.81351 | 10.47994 | 31.71881 | 26.19207 |
|                                  | −0.585578 | 58.93703 | 21.57635 | 21.71147 | 16.27305 | 32.73939 | 21.58552 |
| <i>Capsella bursa pastoris</i>   | 0.585578  | 59.333   | 21.54258 | 39.20901 | 34.72203 | 40.04239 | 33.77391 |
|                                  | −0.585578 | 58.93703 | 17.03871 | 26.67136 | 32.47009 | 39.797   | 31.15833 |
| <i>Centella asiatica</i>         | 0.585578  | 59.333   | 21.54258 | 39.20901 | 34.72203 | 40.04239 | 33.77391 |
|                                  | −0.585578 | 58.93703 | 17.03871 | 26.67136 | 32.47009 | 39.797   | 31.15833 |
| <i>Cinnamomum zeylanicum</i>     | 0.585578  | 59.333   | 31.32442 | 33.51443 | 51.34412 | 41.20796 | 41.44777 |
|                                  | −0.585578 | 58.93703 | 26.21253 | 36.88107 | 53.59606 | 41.39758 | 44.30874 |
| <i>Curcuma longa</i>             | 0.585578  | 55.333   | 18.9401  | 27.65249 | 24.37435 | 22.6312  | 22.33004 |
|                                  | −0.585578 | 56.93703 | 19.49563 | 26.45344 | 25.83741 | 21.92293 | 23.66851 |
| <i>Ellettaria cardamomum</i>     | 0.585578  | 59.333   | 28.54046 | 27.66784 | 32.60521 | 48.38269 | 53.06174 |
|                                  | −0.585578 | 58.93703 | 28.70373 | 31.7551  | 37.34553 | 49.13557 | 53.39078 |
| <i>Euphorbia hirta</i>           | 0.9834    | 56.4324  | 26.0235  | 25.7509  | 24.8744  | 35.549   | 37.524   |
|                                  | −0.9834   | 63.2416  | 26.5633  | 24.2865  | 23.891   | 35.1379  | 35.654   |
| <i>Euphorbia longan</i>          | 0.9834    | 56.4324  | 23.6505  | 23.0358  | 22.0631  | 24.9726  | 23.1541  |
|                                  | −0.9834   | 63.2416  | 22.0096  | 22.806   | 32.4425  | 21.2337  | 24.5243  |
| <i>Fritillaria thunbergii</i>    | 0.9834    | 56.4324  | 22.9102  | 25.8712  | 24.8343  | 33.3711  | 26.3428  |
|                                  | −0.9834   | 63.2416  | 26.9562  | 26.3789  | 24.7595  | 32.0276  | 27.6214  |
| <i>Hyssopous officinalis</i>     | 0.9834    | 56.264   | 25.0722  | 24.9332  | 22.3677  | 29.9257  | 30.6606  |
|                                  | −0.9834   | 63.4099  | 27.3918  | 24.6232  | 21.1331  | 33.0929  | 30.3544  |
| <i>Hypericum perforatum</i>      | 0.9834    | 56.4324  | 30.5104  | 31.0396  | 32.4666  | 47.3703  | 39.536   |
|                                  | −0.9834   | 63.2416  | 31.6756  | 33.728   | 30.0294  | 48.1043  | 36.226   |
| <i>Juglans regia</i>             | 0.9834    | 56.264   | 32.3864  | 32.1726  | 27.512   | 73.5347  | 59.4795  |
|                                  | −0.9834   | 63.4099  | 37.4586  | 33.2362  | 28.4206  | 72.708   | 59.1165  |
| <i>Lilium brownie</i>            | 0.9834    | 56.264   | 23.1187  | 22.675   | 24.2036  | 24.3482  | 23.2809  |
|                                  | −0.9834   | 63.4099  | 22.9102  | 26.1384  | 24.5724  | 25.8881  | 22.8609  |
| <i>Paullinia cupana</i>          | 0.9834    | 56.4324  | 23.6505  | 23.0358  | 22.0631  | 31.6558  | 36.8221  |
|                                  | −0.9834   | 63.2416  | 22.0096  | 22.806   | 32.4425  | 33.1825  | 37.067   |
| <i>Uncaria rhynchophylla</i>     | 0.9834    | 56.4324  | 26.0235  | 25.7509  | 24.8744  | 32.1239  | 34.3811  |
|                                  | −0.9834   | 63.2416  | 26.5633  | 24.2865  | 23.891   | 31.8395  | 30.4134  |
| <i>Zingiber officinale</i>       | 0.585578  | 59.333   | 26.01617 | 27.84225 | 29.21181 | 30.89064 | 33.87429 |
|                                  | −0.585578 | 58.93703 | 24.80612 | 23.96458 | 25.83466 | 32.23468 | 31.61006 |
| <i>Leonorus cardica</i>          | 0.585578  | 59.333   | 32.63297 | 25.55415 | 28.61779 | 36.53728 | 31.36189 |
|                                  | −0.585578 | 58.93703 | 34.24454 | 27.60574 | 22.39701 | 35.97959 | 33.68747 |
| <i>Salvia officinalis</i>        | 0.585578  | 59.333   | 30.97537 | 26.92189 | 25.019   | 41.51191 | 37.34036 |
|                                  | −0.585578 | 58.93703 | 25.18227 | 28.08726 | 28.75721 | 40.19575 | 38.39998 |

**Table S3.** % butyrylcholinesterase inhibitory activity of plant extracts ( $n = 18$ ).

| Plant Extract (mg/mL)            | NC (%)     | PC (%)   | 25 (%)   | 50 (%)   | 100 (%)  | 250 (%)  | 500 (%)  |
|----------------------------------|------------|----------|----------|----------|----------|----------|----------|
| <i>Anemarrhena asphodeloides</i> | 0.9690363  | 74.03226 | 41.63071 | 37.93626 | 34.15096 | 59.46066 | 52.57104 |
|                                  | −0.9690363 | 73.12564 | 37.5653  | 38.06496 | 36.44485 | 50.74366 | 44.06694 |
| <i>Capsella bursa pastoris</i>   | 0.9690363  | 74.03226 | 42.21364 | 40.0106  | 43.68234 | 61.21707 | 45.98303 |
|                                  | −0.9690363 | 73.12564 | 47.16481 | 43.24324 | 43.81861 | 61.94476 | 54.15595 |
| <i>Centella asiatica</i>         | −2.128794  | 74.03226 | 50.20666 | 47.33567 | 48.37563 | 64.87258 | 66.75694 |

|                               |            |          |          |          |          |          |          |
|-------------------------------|------------|----------|----------|----------|----------|----------|----------|
|                               | 2.128794   | 73.12564 | 53.91316 | 51.7177  | 50.45554 | 66.43247 | 67.46793 |
| <i>Cinnamomum zeylanicum</i>  | −0.2820947 | 73.69852 | 65.03052 | 65.36903 | 67.5745  | 77.7726  | 86.3498  |
|                               | 0.2820947  | 75.03206 | 65.95374 | 68.68236 | 70.14925 | 78.2025  | 85.99456 |
| <i>Curcuma longa</i>          | 0.9690363  | 74.03226 | 54.35759 | 56.01085 | 42.89143 | 57.35301 | 55.34421 |
|                               | −0.9690363 | 73.12564 | 43.15808 | 51.77992 | 43.98471 | 54.50869 | 52.58878 |
| <i>Ellettaria cardamomum</i>  | −0.8939882 | 74.03226 | 49.71588 | 55.62996 | 63.80976 | 81.91755 | 84.45112 |
|                               | 0.8939882  | 73.12564 | 53.67549 | 56.09324 | 63.67223 | 81.67143 | 84.04575 |
| <i>Euphorbia hirta</i>        | −0.8939882 | 74.03226 | 49.27431 | 40.34167 | 43.2227  | 58.73539 | 58.27211 |
|                               | 0.8939882  | 73.12564 | 43.62807 | 42.62481 | 45.76351 | 59.7271  | 57.38898 |
| <i>Euphorbia longan</i>       | 2.018247   | 73.69828 | 61.66252 | 55.33131 | 51.24873 | 52.59561 | 52.53225 |
|                               | −2.018247  | 75.14515 | 60.34467 | 58.15132 | 56.92563 | 55.66418 | 47.12831 |
| <i>Fritillaria thunbergii</i> | 2.018247   | 73.69828 | 64.8696  | 68.62437 | 62.18164 | 66.99134 | 66.64059 |
|                               | −2.018247  | 75.14515 | 68.80472 | 66.86434 | 63.35204 | 68.66409 | 64.7694  |
| <i>Hyssopous officinalis</i>  | 2.018247   | 73.69828 | 57.14681 | 52.83384 | 56.35425 | 66.52299 | 69.39452 |
|                               | −2.018247  | 75.14515 | 60.42761 | 59.96682 | 54.42816 | 65.31592 | 69.19178 |
| <i>Hypericum perforatum</i>   | −0.2820947 | 73.69852 | 58.98343 | 57.74222 | 57.28061 | 78.27794 | 63.60466 |
|                               | 0.2820947  | 75.03206 | 60.62471 | 59.93743 | 56.3779  | 79.30779 | 69.14397 |
| <i>Juglans regia</i>          | −0.8939882 | 72.10178 | 49.65435 | 45.10116 | 49.65435 | 89.09325 | 69.81848 |
|                               | 0.8939882  | 71.58782 | 48.42376 | 43.60987 | 48.42376 | 91.28996 | 68.53031 |
| <i>Lilium brownii</i>         | 0.5963488  | 74.03226 | 45.75787 | 31.25526 | 44.03834 | 51.0116  | 55.70922 |
|                               | −0.5963488 | 73.12564 | 46.71642 | 39.91146 | 48.80182 | 49.44572 | 54.2531  |
| <i>Paullinia cupana</i>       | 0.6321017  | 74.03226 | 62.21762 | 66.26534 | 64.83558 | 63.29762 | 65.91337 |
|                               | −0.6321017 | 73.12564 | 61.81127 | 67.61231 | 67.32636 | 68.72005 | 62.60861 |
| <i>Uncaria rhynchophylla</i>  | 0.6321017  | 74.03226 | 49.88336 | 48.84491 | 53.67597 | 47.28229 | 47.96415 |
|                               | −0.6321017 | 73.12564 | 42.79479 | 49.55979 | 48.19776 | 47.33424 | 48.46419 |
| <i>Zingiber officinale</i>    | 0.5963488  | 74.03226 | 39.42121 | 35.60897 | 39.06267 | 57.82388 | 62.52881 |
|                               | −0.5963488 | 73.12564 | 43.6798  | 29.83573 | 36.31142 | 60.23854 | 60.86782 |
| <i>Leonorus cardica</i>       | 0.9690363  | 74.03226 | 48.74631 | 41.47173 | 39.81376 | 44.95491 | 65.85352 |
|                               | −0.9690363 | 73.12564 | 49.10144 | 40.20744 | 48.24741 | 49.82903 | 66.79382 |
| <i>Salvia officinalis</i>     | −0.2820947 | 73.69852 | 60.91798 | 64.27204 | 74.24686 | 75.56901 | 84.61784 |
|                               | 0.2820947  | 75.03206 | 60.0616  | 63.46725 | 70.0616  | 75.78443 | 83.69929 |

NC= Negative control (Sodium phosphate buffer); PC= Positive control (Galantamine 2  $\mu$ M).

**Table S4.** Summary of *in vitro* and *in vivo* (in *G. pallida*  $\pm$  pretreated with A $\beta$ (1–42) peptide) activities exerted by the screened ethanolic phytoextracts ( $n = 5$ ). The relative effects are specified from (−) : insufficient or not screened/determined effect to (+)<sub>4</sub>, or (+)<sub>5</sub>, or (+)<sub>7</sub>: highest relative effect for a given parameter.

| Plant extract | In Vitro Screening<br>(from $n = 18$ plant extracts) |                      |                      |                            |                   | Potential In Vivo AD Protecting Effects |                    |                   |                         |
|---------------|------------------------------------------------------|----------------------|----------------------|----------------------------|-------------------|-----------------------------------------|--------------------|-------------------|-------------------------|
|               | AChE<br>( $n = 5$ )                                  | BuChE<br>( $n = 5$ ) | BACE1<br>( $n = 4$ ) | Antioxidant<br>( $n = 7$ ) | CI<br>( $n = 5$ ) | Survival<br>( $n = 5$ )                 | ROS<br>( $n = 5$ ) | MR<br>( $n = 5$ ) | GSSH/GSH<br>( $n = 5$ ) |
| <i>J. r</i>   | +++++                                                | +++++                | +++                  | +++++                      | +++++             | +++++                                   | +++                | +++               | +++                     |
| <i>E. c</i>   | ++++                                                 | ++++                 | ++                   | +++                        | ++++              | ++++                                    | ++++               | +++++             | +++++                   |
| <i>C. z</i>   | +++                                                  | +++                  | −                    | +++++                      | +++               | +++                                     | +++++              | ++++              | ++++                    |
| <i>S. o</i>   | ++                                                   | ++                   | ++++                 | ++                         | ++                | ++                                      | ++                 | ++                | ++                      |
| <i>H. p</i>   | +                                                    | +                    | −                    | +++++                      | +                 | +                                       | +                  | +                 | +                       |
| <i>F. t</i>   | −                                                    | −                    | +                    | +                          | −                 | −                                       | −                  | −                 | −                       |
| <i>P. c</i>   | −                                                    | −                    | −                    | ++++                       | −                 | −                                       | −                  | −                 | −                       |

J. r : Juglan regia; E. c : Ellettaria cardamomum; C. z : Cinnamomum zeylanicum; S. o : Salvia officinalis; H. p : H. perforatum; F. t : F. thunbergii; P. c : P. cupana; AChE : acetylcholinesterase; BuChE : butylcholinesterase; BACE1 : beta-secretase

---

1; CI : Chemotaxis index; ROS : Reactive oxygen species; MR : Mitochondrial reductase; GSSH/GSH ratio : oxidized glutathione/reduced glutathione ration (= total glutathione).
